# Supplementary material for: Unveiling Novel Kunitz- and Waprin-Type Toxins in the Micrurus mipartitus Coral Snake Venom Gland: An In Silico Transcriptome Analysis
Source: MDPI journal article supplement (doi:10.3390/toxins16050224), 2024-05-11
Supplement: s1 [file s1]

**Table S1.** Quantitative summary of estimates of Kunitz-type serine protease inhibitor abundances (% of total protein content) in venom from some *Micrurus* species analyzed by the proteomics strategy.

| <i>Micrurus</i> species                             | Relative abundance in percentage | Reference                           |
|-----------------------------------------------------|----------------------------------|-------------------------------------|
| <i>M. lemniscatus carvalhoi</i>                     | 0.03                             | Sanz et al., 2019 [27]              |
| <i>M. clarkii</i>                                   | 0.9                              | Lomonte et al., 2016 [28]           |
| <i>M. yatesi</i>                                    | 0.9                              | Mena et al., 2022 [29]              |
| <i>M. frontalis</i>                                 | 1.0                              | Sanz et al., 2019 [27]              |
| <i>M. spixi spixi</i>                               | 1.1                              | Sanz et al., 2019 [27]              |
| <i>M. tschudii tschudii</i>                         | 1.6                              | Sanz et al., 2016 [30]              |
| <i>M. multifasciatus</i>                            | 1.9                              | Rey-Suarez et al., 2011 [31]        |
| <i>M. mipartitus</i>                                | 1.9                              | Rey-Suarez et al., 2011 [31]        |
| <i>M. altirostris</i>                               | 2.1                              | Corrêa-Netto et al., 2011 [32]      |
| <i>M. helleri</i> ( <i>M. lemniscatus helleri</i> ) | 2.2                              | Rodriguez-Vargas et al., 2023 [33]  |
| <i>M. browni browni</i>                             | 2.7                              | Bérnard-Valle et al., 2020 [34]     |
| <i>M. sangilensis</i>                               | 2.9                              | Rodriguez-Vargas et al., 2023 [33]  |
| <i>M. pyrrhocryptus</i>                             | 5.0                              | Olamendi-Portugal et al., 2018 [35] |
| <i>M. medemi</i>                                    | 5.3                              | Rodriguez-Vargas et al., 2023 [33]  |
| <i>M. helleri</i> ( <i>M. lemniscatus helleri</i> ) | 5.9                              | Sanz et al., 2019 [27]              |
| <i>M. dumerilii</i>                                 | 9.0                              | Rey-Suarez et a., 2016 [36]         |
| <i>M. ibiboboca</i>                                 | 9.4                              | Sanz et al., 2019 [27]              |
| <i>M. mosquitensis</i>                              | 9.8                              | Fernandez et al., 2015 [37]         |
| <i>M. ruatanus</i>                                  | 10.6                             | Lippa et al., 2019 [38]             |

|                          |    |                                                          |
|--------------------------|----|----------------------------------------------------------|
| <i>M. nigrocinctus</i> * | ND | Fernandez et al., 2011 [39], Fernandez et al., 2015 [37] |
|--------------------------|----|----------------------------------------------------------|

\* In the proteomic analysis of *M. nigrocinctus* venom, Kunitz was not identified. However, in the study by Fernandez et al., 2015, a subsequent search was conducted in the database, revealing peptides that matched the Mit-Tx complex.
